# Supplementary material
Source: publisher site journal article supplement (https://www.dovepress.com/article/478993)
Supplement: Supplementary file 1 [file get_supplementary_file.php]

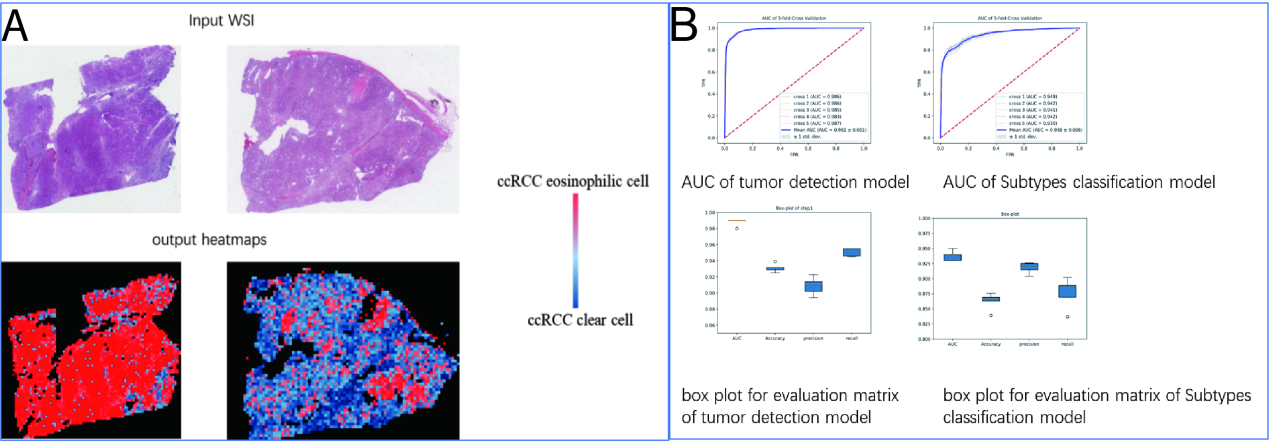


**Supplementary Figure 1.** (A) Tissue slides from the TCGA test set illustrating the spatial distribution of predicted MSI scores in patients with clear and eosinophilic ccRCC tumors. (B) Training and validation of models on the TCGA cohort for tumor detection and subtype classification.

**
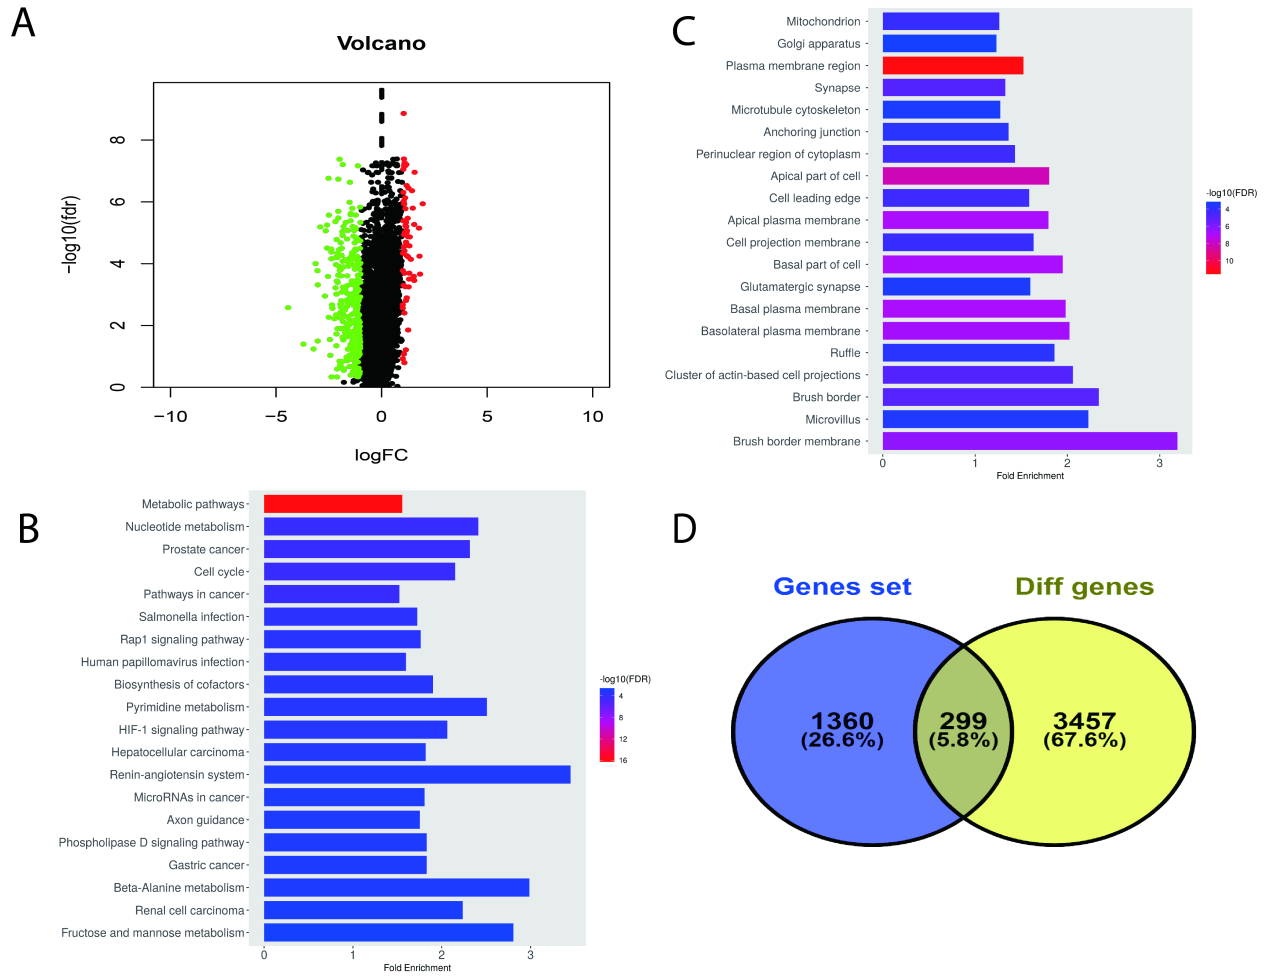
**

**Supplementary Figure 2.** Comparative gene expression and pathway analysis in two ccRCC subtypes: eosinophilic vs. clear. (A) Volcano plot depicting differentially expressed genes (DEGs) between both subtypes. (B, C) Overview of top enriched pathways distinguishing the two subtypes. (B) Analysis of KEGG pathways involved. (C) GO analysis targeting cellular processes. (D) Intersection of DEGs with a gene set including metabolic and mitochondrial genes, as identified through ssGSEA.


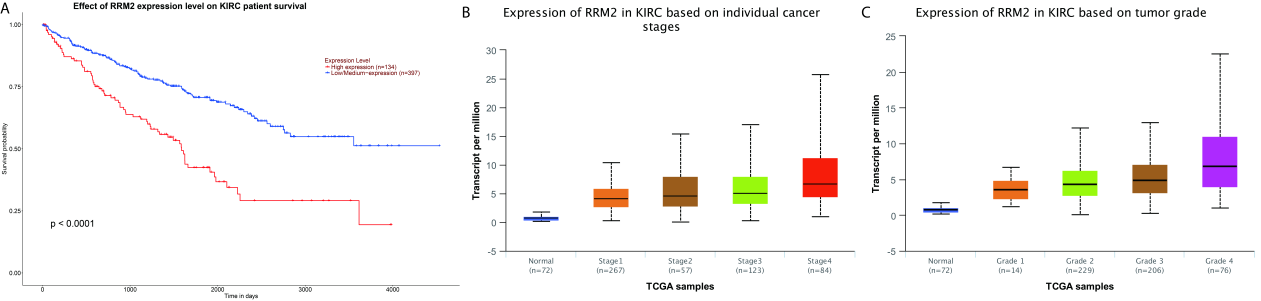


**Supplementary Figure 3:** Analysis of RRM2 Gene Expression in the TCGA Whole KIRC Cohort. (A) Survival analysis comparing high versus low RRM2 expression groups. (B) RRM2 gene expression across various cancer stages. (C) RRM2 gene expression across different tumor grades.


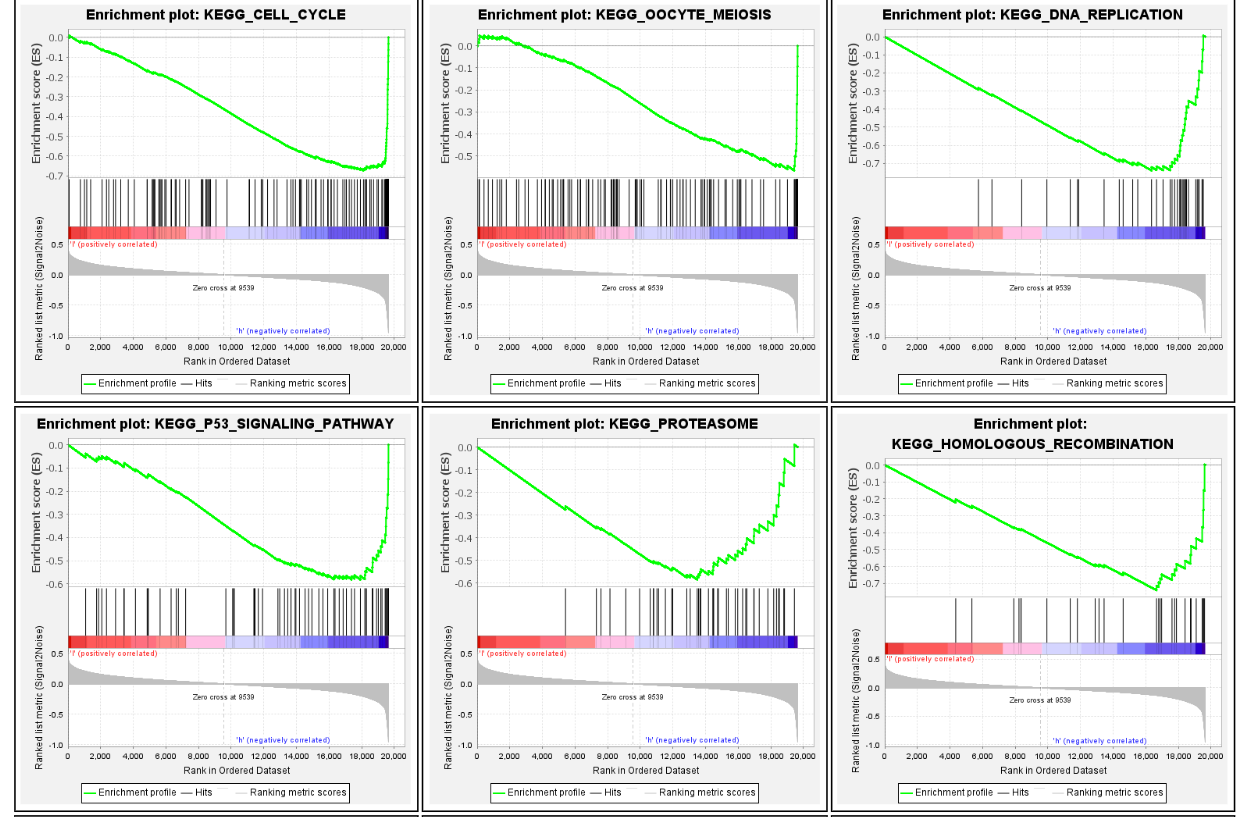


**Supplementary Figure 4:** KEGG pathway enrichment analysis in ccRCC cohorts based on RRM2 gene expression levels. Comparison of top KEGG enrichment pathways between high and low RRM2 expression groups.


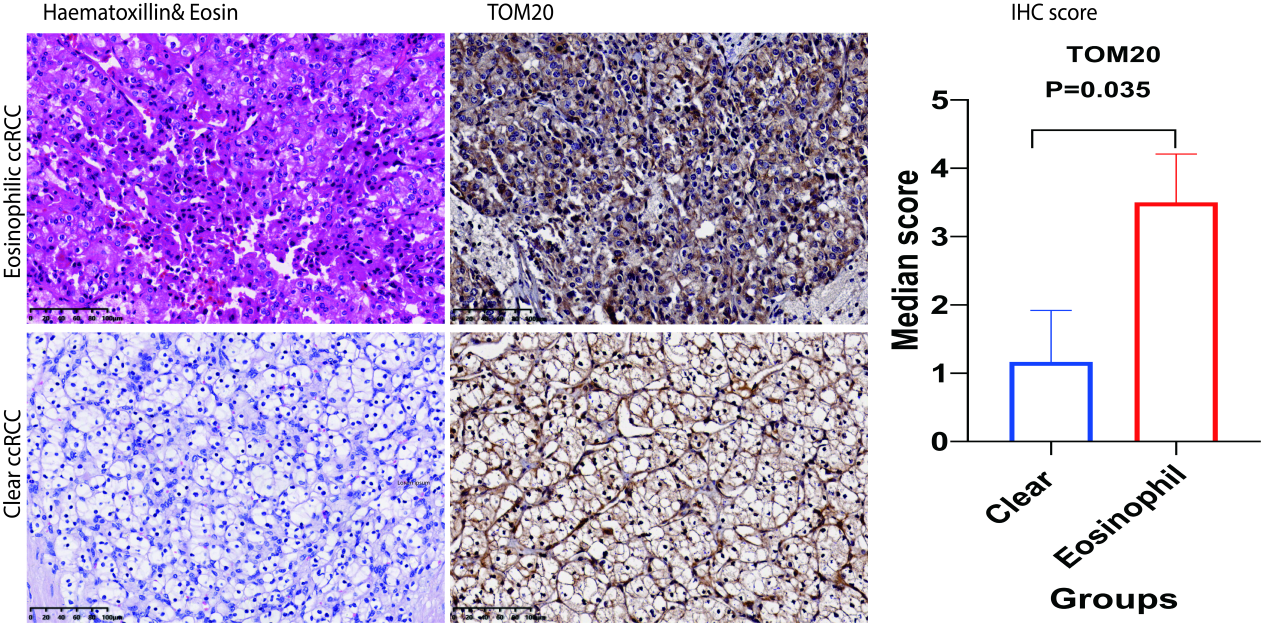


**Supplementary Figure 5:** Immunohistochemical (IHC) characterization of ccRCC subtypes (eosinophilic vs. clear). The left panel shows representative H&E and IHC staining for mitochondrial antibody（TOM20）. The eosinophilic ccRCC (top row) displays distinct granular morphology in H&E and more intense IHC staining compared to the clear ccRCC (bottom row). The antibody used is indicated above each column. scale bar = 100 µm. The right panel quantifies IHC scores using the Mann-Whitney U test, showing significantly higher expression of TOM20 antibody in eosinophilic ccRCC (P = 0.035).

**Supplementary Table 1:** Logistic regression analysis predicting subtypes in the TCGA ccRCC cohort: eosinophilic vs. clear.

| **Variable** | **Coefficient(B)** | **Std.error** | **Odds ratio (Exp(B))** | **95% CI for Exp(B)** | **P-value** |
| --- | --- | --- | --- | --- | --- |
| **Age** | 0.353 | 0.381 | 1.42 | (0.675-3) | 0.354 |
| **Gender** | 0.059 | 0.373 | 1.06 | (0.51-2.2) | 0.874 |
| **Grade** | 1.4 | 0.394 | 4.07 | (1.88-8.838) | 0.0001 |
| **Stage** | 0.69 | 0.381 | 1.99 | (0.946-4.2) | 0.070 |

**Supplementary Table 2:** Univariate cox regression analysis of differentially expressed genes (DEGs) between ccRCC subtypes with P value less than 0.0001.

| **Gene id** | **HR** | **HR.95L** | **HR.95H** | **P Value** |
| --- | --- | --- | --- | --- |
| **AMN** | 0.349655362563636 | 0.225796898316325 | 0.541455057536846 | 2.48260539956464e-06 |
| **GALC** | 0.0810150265848609 | 0.0259911915093392 | 0.252525342294806 | 1.47362928843233e-05 |
| **CPT2** | 0.0616611489180119 | 0.0212995852829858 | 0.178505695551095 | 2.78880563826081e-07 |
| **PIK3R3** | 0.175755591391117 | 0.0859960027314381 | 0.359203066701943 | 1.86610615029968e-06 |
| **RGL1** | 0.0684536095899711 | 0.0225871780039623 | 0.207458260836045 | 2.13481236903835e-06 |
| **EPHX2** | 0.212991827713335 | 0.10406158855766 | 0.435948742484651 | 2.31868653857835e-05 |
| **PRKD1** | 0.102051369422924 | 0.0399508345405141 | 0.260682464355854 | 1.8446889122922e-06 |
| **KHK** | 0.380367828888851 | 0.253728466573429 | 0.570214636171885 | 2.87834335856132e-06 |
| **ASRGL1** | 0.177285562827827 | 0.0871986468783376 | 0.360443331546551 | 1.76569997241758e-06 |
| **CRYM** | 0.257857296186927 | 0.151016541801103 | 0.440285444255531 | 6.86507626553998e-07 |
| **GATM** | 0.271104980413932 | 0.16199130614742 | 0.453715153937657 | 6.7712780502961e-07 |
| **CUBN** | 0.449229116941414 | 0.324067816831494 | 0.622730147908815 | 1.56684384800864e-06 |
| **FAAH** | 0.217364208707544 | 0.11298735434075 | 0.41816360337607 | 4.83770548256347e-06 |
| **ASPA** | 0.414181290277997 | 0.271786538997396 | 0.631179681853156 | 4.11723110811766e-05 |
| **RRM2** | 5.75561549329873 | 2.48337502219843 | 13.3395517835942 | 4.48499478947126e-05 |
| **ACADM** | 0.0678620226696528 | 0.0252015104012649 | 0.182737226757065 | 1.02052041110966e-07 |
| **PLPP3** | 0.0520609573362166 | 0.0169569104113518 | 0.159837093728402 | 2.42078814069384e-07 |
| **PIK3C2B** | 0.0798619230145647 | 0.0270678434372993 | 0.235627443403767 | 4.68317462854903e-06 |
| **PKLR** | 0.481095515904513 | 0.33509917933835 | 0.69069967846663 | 7.32385187075447e-05 |
| **MGAM** | 0.367640980893146 | 0.255138469833818 | 0.529751122675108 | 7.92504763729332e-08 |
| **ALDOB** | 0.500253027931631 | 0.366066441865467 | 0.683627514938219 | 1.38037599905407e-05 |
| **PPARG** | 0.0853090871015442 | 0.0264202261432456 | 0.275457155538368 | 3.85751160298695e-05 |
| **ACAD11** | 0.256733163518485 | 0.139799736218506 | 0.471473831303868 | 1.16266726675686e-05 |
| **MLYCD** | 0.114627246225707 | 0.0420440648085929 | 0.312515110922466 | 2.30739630762497e-05 |
| **ENTPD2** | 0.318369195400729 | 0.194886320465774 | 0.520092658827269 | 4.86163055298704e-06 |
| **SLC10A2** | 0.327361422270028 | 0.226175981388843 | 0.473814682410578 | 3.23297227316883e-09 |
| **ABCG1** | 0.179770194770065 | 0.077070174421017 | 0.419323339676447 | 7.15158850262865e-05 |
| **DMGDH** | 0.274970736152695 | 0.177255732884627 | 0.426552667775026 | 8.249366436046e-09 |
| **DDC** | 0.437532575793325 | 0.323752107866945 | 0.591300412348254 | 7.47564694490268e-08 |
| **SLC27A2** | 0.337155086433158 | 0.227828332128749 | 0.49894388132338 | 5.42927168164003e-08 |
| **GLUD2** | 0.0686446871209088 | 0.0231454118652121 | 0.203586486054708 | 1.36878282275487e-06 |
| **AMDHD1** | 0.23062170366011 | 0.125710523031549 | 0.423086062459097 | 2.15456400088308e-06 |
| **ENTPD5** | 0.148115463376187 | 0.0600492625586 | 0.365336551297924 | 3.38420799564917e-05 |
| **ACOT4** | 0.27168848347024 | 0.145397959948242 | 0.507673093051888 | 4.40280815286473e-05 |
| **SLC44A3** | 0.100525041116535 | 0.0376903937429275 | 0.268112982857262 | 4.43413198906711e-06 |
| **SLC2A2** | 0.397733547839546 | 0.278090188056316 | 0.568851336261448 | 4.42082497448077e-07 |
| **HAO2** | 0.466049405938935 | 0.337929555481829 | 0.642743569636406 | 3.24020068353819e-06 |
| **PECR** | 0.0955689034167936 | 0.0351576675367375 | 0.259784449316627 | 4.18869757484447e-06 |
| **G6PC** | 0.323918563259238 | 0.196723372092505 | 0.533354194307889 | 9.40732842312499e-06 |
| **LIPE** | 0.083745107436465 | 0.0313962747446875 | 0.223378189819535 | 7.25683618831868e-07 |
| **HYAL2** | 0.0603747132798204 | 0.0160884691650803 | 0.226566366645508 | 3.17704009019712e-05 |
| **ARSB** | 0.0452232842714794 | 0.0141104416975447 | 0.144938442334864 | 1.88615608284485e-07 |

**Supplementary Table 3:** Common gene set enrichment analysis (GSEA) results for KEGG and GO pathways comparing high versus low RRM2 expression in clear cell renal cell carcinoma (ccRCC).

| **KEGG enrichment Pathways between RRM2 high versus low RRM2 expression in ccRCC** | **ES** | **NES** | **FDR q-val** |
| --- | --- | --- | --- |
|  |  |  |  |
| KEGG_CELL_CYCLE | 124 | 0.67 | 0 |
| KEGG_OOCYTE_MEIOSIS | 112 | 0.57 | 0 |
| KEGG_DNA_REPLICATION | 36 | 0.74 | 0 |
| KEGG_P53_SIGNALING_PATHWAY | 67 | 0.58 | 0 |
| KEGG_HOMOLOGOUS_RECOMBINATION | 28 | 0.74 | 0 |
| KEGG_PROTEASOME | 44 | 0.58 | 0.006 |
| KEGG_MISMATCH_REPAIR | 23 | 0.68 | 0.004 |
| KEGG_SYSTEMIC_LUPUS_ERYTHEMATOSUS | 54 | 0.74 | 0.008 |
| KEGG_PROGESTERONE_MEDIATED_OOCYTE_MATURATION | 85 | 0.5 | 0 |
| KEGG_BASE_EXCISION_REPAIR | 33 | 0.59 | 0.002 |
| KEGG_LEISHMANIA_INFECTION | 69 | 0.67 | 0.008 |
| KEGG_INTESTINAL_IMMUNE_NETWORK_FOR_IGA_PRODUCTION | 46 | 0.68 | 0.01 |
| KEGG_TOLL_LIKE_RECEPTOR_SIGNALING_PATHWAY | 102 | 0.54 | 0.008 |
| KEGG_PRIMARY_IMMUNODEFICIENCY | 35 | 0.75 | 0.01 |
| KEGG_PATHOGENIC_ESCHERICHIA_COLI_INFECTION | 55 | 0.45 | 0.019 |
| KEGG_TYPE_I_DIABETES_MELLITUS | 41 | 0.68 | 0.021 |
| KEGG_CYTOSOLIC_DNA_SENSING_PATHWAY | 53 | 0.53 | 0.012 |
| KEGG_PRION_DISEASES | 35 | 0.55 | 0.006 |
| KEGG_CYTOKINE_CYTOKINE_RECEPTOR_INTERACTION | 263 | 0.51 | 0.012 |
| KEGG_AUTOIMMUNE_THYROID_DISEASE | 50 | 0.63 | 0.018 |
|  |  |  |  |
| **GO enrichment Pathways between RRM2 high versus low RRM2 expression in ccRCC** | **ES** | **NES** | **FDR q-val** |
| GOBP_MITOTIC_SISTER_CHROMATID_SEGREGATION | -0.7743406 | -2.6372936 | 0 |
| GOBP_SISTER_CHROMATID_SEGREGATION | -0.74273896 | -2.6311407 | 0 |
| GOBP_MITOTIC_SPINDLE_ASSEMBLY | -0.7529363 | -2.6269968 | 0 |
| GOBP_NUCLEAR_CHROMOSOME_SEGREGATION | -0.6999709 | -2.5981524 | 0 |
| GOBP_MITOTIC_NUCLEAR_DIVISION | -0.6892435 | -2.5874057 | 0 |
| GOBP_MITOTIC_METAPHASE_CHROMOSOME_ALIGNMENT | -0.7722436 | -2.5854406 | 0 |
| GOBP_REGULATION_OF_SISTER_CHROMATID_SEGREGATION | -0.7673825 | -2.58345 | 0 |
| GOBP_MITOTIC_SPINDLE_ORGANIZATION | -0.7162304 | -2.5197315 | 0 |
| GOBP_REGULATION_OF_CHROMOSOME_SEGREGATION | -0.753464 | -2.5142915 | 0 |
| GOBP_CHROMOSOME_SEGREGATION | -0.6650568 | -2.5081878 | 0 |
| GOBP_METAPHASE_CHROMOSOME_ALIGNMENT | -0.7451339 | -2.5055194 | 0 |
| GOBP_REGULATION_OF_NUCLEAR_DIVISION | -0.70005566 | -2.4999976 | 0 |
| GOBP_CHROMOSOME_LOCALIZATION | -0.70847905 | -2.4960616 | 0 |
| GOBP_NEGATIVE_REGULATION_OF_CHROMOSOME_ORGANIZATION | -0.76630473 | -2.495444 | 0 |
| GOBP_REGULATION_OF_MITOTIC_NUCLEAR_DIVISION | -0.73557156 | -2.4862278 | 0 |
| GOCC_SPINDLE_MICROTUBULE | -0.67008924 | -2.479355 | 0 |
| GOBP_MICROTUBULE_CYTOSKELETON_ORGANIZATION_INVOLVED_IN_MITOSIS | -0.68110245 | -2.4478617 | 1.46E-04 |
| GOBP_CHROMOSOME_SEPARATION | -0.8182406 | -2.4323556 | 1.38E-04 |
| GOBP_CYTOKINETIC_PROCESS | -0.6548046 | -2.4286025 | 1.31E-04 |
| GOBP_MITOTIC_SISTER_CHROMATID_SEPARATION | -0.85211694 | -2.4282436 | 1.24E-04 |
| GOCC_CONDENSED_CHROMOSOME_CENTROMERIC_REGION | -0.6965021 | -2.4172902 | 1.18E-04 |
| GOBP_ORGANELLE_FISSION | -0.6021115 | -2.4165702 | 1.13E-04 |
| GOBP_REGULATION_OF_MITOTIC_SISTER_CHROMATID_SEGREGATION | -0.84967965 | -2.3899248 | 3.42E-04 |
| GOBP_NEGATIVE_REGULATION_OF_MITOTIC_CELL_CYCLE_PHASE_TRANSITION | -0.6288194 | -2.3557515 | 7.48E-04 |
| GOCC_ANAPHASE_PROMOTING_COMPLEX | -0.7318258 | -2.354963 | 7.18E-04 |
| GOBP_NEGATIVE_REGULATION_OF_NUCLEAR_DIVISION | -0.80722713 | -2.3545887 | 6.90E-04 |
| GOBP_SPINDLE_ORGANIZATION | -0.61829734 | -2.3504257 | 6.65E-04 |
| GOCC_CHROMOSOME_CENTROMERIC_REGION | -0.6717191 | -2.3498294 | 6.41E-04 |
| GOCC_CONDENSED_CHROMOSOME | -0.63508046 | -2.34919 | 6.19E-04 |
| GOBP_REGULATION_OF_MITOTIC_CELL_CYCLE_SPINDLE_ASSEMBLY_CHECKPOINT | -0.85419375 | -2.3467603 | 5.98E-04 |
| GOBP_NEGATIVE_REGULATION_OF_CHROMOSOME_SEGREGATION | -0.85593104 | -2.343775 | 6.42E-04 |
| GOBP_MITOTIC_CELL_CYCLE_PHASE_TRANSITION | -0.5697365 | -2.3408396 | 6.22E-04 |
| GOBP_POSITIVE_REGULATION_OF_MITOTIC_CELL_CYCLE_PHASE_TRANSITION | -0.6240562 | -2.3406293 | 6.03E-04 |
| GOBP_SPINDLE_ASSEMBLY | -0.63762635 | -2.335192 | 7.29E-04 |
| GOBP_MITOTIC_CELL_CYCLE_CHECKPOINT_SIGNALING | -0.68621683 | -2.3315032 | 7.08E-04 |
| GOBP_CELL_CYCLE_CHECKPOINT_SIGNALING | -0.6735246 | -2.3223746 | 7.18E-04 |
| GOBP_REGULATION_OF_CELL_CYCLE_CHECKPOINT | -0.7412317 | -2.3191233 | 6.98E-04 |
| GOBP_NEGATIVE_REGULATION_OF_CELL_CYCLE_PROCESS | -0.60298336 | -2.3144124 | 7.23E-04 |
| GOBP_CELL_CYCLE_G2_M_PHASE_TRANSITION | -0.6201102 | -2.304446 | 7.46E-04 |
| GOBP_NEGATIVE_REGULATION_OF_MITOTIC_CELL_CYCLE | -0.58136535 | -2.2984197 | 7.97E-04 |
| GOBP_REGULATION_OF_MITOTIC_CELL_CYCLE_PHASE_TRANSITION | -0.56749624 | -2.2919834 | 8.39E-04 |
| GOBP_REGULATION_OF_CHROMOSOME_ORGANIZATION | -0.5931917 | -2.2716968 | 0.001239796 |
| GOBP_POSITIVE_REGULATION_OF_METAPHASE_ANAPHASE_TRANSITION_OF_CELL_CYCLE | -0.828628 | -2.2670245 | 0.00140876 |
| GOCC_CHROMOSOMAL_REGION | -0.61392635 | -2.2623026 | 0.001468549 |
| GOBP_ATTACHMENT_OF_SPINDLE_MICROTUBULES_TO_KINETOCHORE | -0.79015577 | -2.2572188 | 0.001645031 |
| GOBP_REGULATION_OF_CYCLIN_DEPENDENT_PROTEIN_KINASE_ACTIVITY | -0.61612254 | -2.2545395 | 0.001667362 |
| GOBP_MEIOTIC_SPINDLE_ORGANIZATION | -0.8030997 | -2.2544043 | 0.001631886 |
| GOBP_MITOTIC_CYTOKINETIC_PROCESS | -0.61925536 | -2.2504478 | 0.001730233 |
| GOBP_CYTOSKELETON_DEPENDENT_CYTOKINESIS | -0.60080385 | -2.2479143 | 0.00172787 |
| GOBP_POSITIVE_REGULATION_OF_CELL_CYCLE_PHASE_TRANSITION | -0.57874274 | -2.2453806 | 0.001838969 |
| GOBP_MIDBODY_ABSCISSION | -0.66086006 | -2.2438252 | 0.001864474 |
| GOBP_MITOTIC_CYTOKINESIS | -0.6478782 | -2.242637 | 0.001963361 |
| GOBP_REGULATION_OF_CELL_CYCLE_PHASE_TRANSITION | -0.55255246 | -2.2322373 | 0.002043698 |
| GOCC_MITOTIC_SPINDLE | -0.59097636 | -2.2317636 | 0.002005852 |
| GOBP_POSITIVE_REGULATION_OF_MITOTIC_CELL_CYCLE | -0.5554988 | -2.2248538 | 0.002273612 |
| GOCC_SPINDLE_MIDZONE | -0.7470772 | -2.2247357 | 0.002233011 |
| GOCC_CYCLIN_DEPENDENT_PROTEIN_KINASE_HOLOENZYME_COMPLEX | -0.65348434 | -2.2230837 | 0.002303158 |
| GOBP_REGULATION_OF_UBIQUITIN_PROTEIN_LIGASE_ACTIVITY | -0.764235 | -2.2200692 | 0.002310296 |
| GOMF_UBIQUITIN_LIKE_PROTEIN_CONJUGATING_ENZYME_ACTIVITY | -0.5434857 | -2.2186089 | 0.002373126 |
| GOBP_NEGATIVE_REGULATION_OF_CELL_CYCLE | -0.5459512 | -2.2166455 | 0.002519869 |
| GOBP_REGULATION_OF_CELL_CYCLE_G2_M_PHASE_TRANSITION | -0.6143997 | -2.2117949 | 0.002536963 |
| GOCC_INTERCELLULAR_BRIDGE | -0.57023525 | -2.2063463 | 0.003098662 |
| GOBP_SISTER_CHROMATID_COHESION | -0.71433276 | -2.1950028 | 0.003354684 |
| GOBP_ATTACHMENT_OF_MITOTIC_SPINDLE_MICROTUBULES_TO_KINETOCHORE | -0.8401928 | -2.1942134 | 0.003399632 |
| GOCC_SPINDLE | -0.53748816 | -2.1931448 | 0.003360808 |
| GOBP_POSITIVE_REGULATION_OF_CHROMOSOME_SEPARATION | -0.8265072 | -2.1854792 | 0.003576756 |
| GOBP_B_CELL_MEDIATED_IMMUNITY | -0.6526628 | -2.182566 | 0.003556273 |
| GOBP_POSITIVE_REGULATION_OF_CELL_CYCLE_PROCESS | -0.5587658 | -2.1766577 | 0.003820367 |
| GOBP_NEGATIVE_REGULATION_OF_CELL_CYCLE_G2_M_PHASE_TRANSITION | -0.636685 | -2.1641376 | 0.00435591 |
| GOBP_ANAPHASE_PROMOTING_COMPLEX_DEPENDENT_CATABOLIC_PROCESS | -0.65752774 | -2.1597707 | 0.004478447 |
| GOBP_POSITIVE_REGULATION_OF_MITOTIC_SISTER_CHROMATID_SEPARATION | -0.8720468 | -2.1576362 | 0.004517977 |
| GOBP_VIRAL_RNA_GENOME_REPLICATION | -0.7035649 | -2.1561937 | 0.004480195 |
| GOBP_REGULATION_OF_MITOTIC_CELL_CYCLE | -0.50284976 | -2.1559536 | 0.004430216 |
| GOBP_DNA_TEMPLATED_DNA_REPLICATION | -0.67865264 | -2.1554866 | 0.004370349 |
| GOBP_REGULATION_OF_MEIOTIC_CELL_CYCLE | -0.60442805 | -2.1550815 | 0.004312078 |
| GOBP_FEMALE_MEIOTIC_NUCLEAR_DIVISION | -0.7561808 | -2.1511102 | 0.004531134 |
| GOMF_DNA_POLYMERASE_BINDING | -0.711089 | -2.1504679 | 0.004483728 |
| GOCC_NUCLEAR_CHROMOSOME | -0.5698766 | -2.1502366 | 0.004436908 |
| GOBP_ORGANELLE_INHERITANCE | -0.7045171 | -2.146615 | 0.004766284 |
| GOBP_DNA_REPLICATION | -0.5913591 | -2.1328464 | 0.005385941 |
| GOBP_CD4_POSITIVE_ALPHA_BETA_T_CELL_PROLIFERATION | -0.7979816 | -2.1326256 | 0.005330068 |
| GOBP_REGULATION_OF_UBIQUITIN_PROTEIN_TRANSFERASE_ACTIVITY | -0.5903143 | -2.126886 | 0.005618189 |
| GOBP_CELL_CYCLE_DNA_REPLICATION | -0.7639266 | -2.1205184 | 0.005976833 |
| GOCC_AZUROPHIL_GRANULE_LUMEN | -0.5371855 | -2.117386 | 0.006202688 |
| GOBP_POSITIVE_REGULATION_OF_CELL_CYCLE | -0.5171101 | -2.1151597 | 0.006236767 |
| GOBP_POSITIVE_REGULATION_OF_CELL_CYCLE_CHECKPOINT | -0.82969165 | -2.114839 | 0.006173917 |
| GOMF_CYCLIN_DEPENDENT_PROTEIN_SERINE_THREONINE_KINASE_REGULATOR_ACTIVITY | -0.6110071 | -2.1092486 | 0.006669225 |
| GOBP_CHROMOSOME_CONDENSATION | -0.7527446 | -2.1063504 | 0.006791772 |
| GOBP_CYTOKINESIS | -0.5322082 | -2.10355 | 0.006924589 |
| GOBP_REGULATION_OF_MONOCYTE_CHEMOTAXIS | -0.75875425 | -2.102922 | 0.006937849 |
| GOBP_SINGLE_STRANDED_VIRAL_RNA_REPLICATION_VIA_DOUBLE_STRANDED_DNA_INTERMEDIATE | -0.80521125 | -2.1015644 | 0.007068172 |
| GOBP_PROTEIN_K11_LINKED_UBIQUITINATION | -0.54726356 | -2.0947075 | 0.007808891 |
| GOBP_REGULATION_OF_TRANSCRIPTION_INVOLVED_IN_G1_S_TRANSITION_OF_MITOTIC_CELL_CYCLE | -0.69401413 | -2.094317 | 0.007787027 |
| GOBP_PROTEIN_LOCALIZATION_TO_CHROMOSOME_CENTROMERIC_REGION | -0.8528399 | -2.091389 | 0.008371964 |
| GOBP_DNA_CONFORMATION_CHANGE | -0.64795595 | -2.0901854 | 0.008390483 |
| GOBP_POSITIVE_REGULATION_OF_CELL_CYCLE_G2_M_PHASE_TRANSITION | -0.66299176 | -2.0849845 | 0.008856702 |
| GOMF_PEPTIDASE_ACTIVATOR_ACTIVITY | -0.5679855 | -2.084901 | 0.008765396 |
| GOBP_POSITIVE_REGULATION_OF_LEUKOCYTE_CHEMOTAXIS | -0.63145983 | -2.0804212 | 0.009175365 |
| GOBP_PROTEIN_LOCALIZATION_TO_CHROMOSOME | -0.58866507 | -2.0767012 | 0.009398853 |
| GOCC_CONDENSED_NUCLEAR_CHROMOSOME | -0.6132806 | -2.0694933 | 0.010213887 |
| GOBP_PHAGOSOME_MATURATION | -0.6492101 | -2.067473 | 0.010320052 |
| GOCC_INNER_KINETOCHORE | -0.88191 | -2.0635989 | 0.010699258 |
| GOBP_LYMPHOCYTE_MEDIATED_IMMUNITY | -0.6082648 | -2.063401 | 0.010604669 |
| GOCC_SPINDLE_POLE | -0.5587654 | -2.0593045 | 0.011028587 |
| GOMF_DNA_EXONUCLEASE_ACTIVITY | -0.6582136 | -2.059139 | 0.010972066 |
| GOBP_POSITIVE_REGULATION_OF_DEFENSE_RESPONSE_TO_VIRUS_BY_HOST | -0.7199941 | -2.0568995 | 0.011151292 |
| GOBP_POSITIVE_REGULATION_OF_T_CELL_PROLIFERATION | -0.6671976 | -2.0552971 | 0.011313038 |
| GOBP_CELLULAR_RESPONSE_TO_IONIZING_RADIATION | -0.581647 | -2.0550458 | 0.011279234 |
| GOBP_CENTROMERE_COMPLEX_ASSEMBLY | -0.80350244 | -2.0537276 | 0.011348977 |
| GOBP_REGULATION_OF_B_CELL_MEDIATED_IMMUNITY | -0.61041266 | -2.0511806 | 0.01161694 |
| GOBP_REGULATION_OF_LEUKOCYTE_CHEMOTAXIS | -0.60735506 | -2.0501802 | 0.011652199 |
| GOCC_REPLICATION_FORK | -0.6903494 | -2.049712 | 0.011577854 |
| GOBP_POSITIVE_REGULATION_OF_CD4_POSITIVE_ALPHA_BETA_T_CELL_ACTIVATION | -0.7296059 | -2.0457819 | 0.011906097 |
| GOBP_POSITIVE_REGULATION_OF_VIRAL_PROCESS | -0.49253884 | -2.04043 | 0.012562404 |
| GOBP_KINETOCHORE_ASSEMBLY | -0.8234197 | -2.0377345 | 0.01296471 |
| GOBP_POSITIVE_REGULATION_OF_LEUKOCYTE_CELL_CELL_ADHESION | -0.5958966 | -2.0356057 | 0.013049524 |
| GOBP_MEIOTIC_CELL_CYCLE_PROCESS | -0.6003272 | -2.0332716 | 0.013222864 |
| GOBP_REGULATION_OF_ATTACHMENT_OF_SPINDLE_MICROTUBULES_TO_KINETOCHORE | -0.828291 | -2.0318887 | 0.013413692 |
| GOBP_CELL_DIFFERENTIATION_INVOLVED_IN_EMBRYONIC_PLACENTA_DEVELOPMENT | -0.66651505 | -2.0316944 | 0.013318131 |
| GOBP_REGULATION_OF_CD8_POSITIVE_ALPHA_BETA_T_CELL_ACTIVATION | -0.7691993 | -2.0312917 | 0.01335266 |
| GOBP_MEIOTIC_CHROMOSOME_SEGREGATION | -0.6503026 | -2.0302827 | 0.01343124 |
| GOBP_CYTOKINE_PRODUCTION_INVOLVED_IN_INFLAMMATORY_RESPONSE | -0.61779827 | -2.024682 | 0.014304387 |
| GOBP_ADAPTIVE_IMMUNE_RESPONSE_BASED_ON_SOMATIC_RECOMBINATION_OF_IMMUNE_RECEPTORS_BUILT_FROM_IMMUNOGLOBULIN_SUPERFAMILY_DOMAINS | -0.59917957 | -2.0243964 | 0.014257744 |
| GOCC_COPI_COATED_VESICLE | -0.59850794 | -2.023598 | 0.014310567 |
| GOBP_MITOTIC_SISTER_CHROMATID_COHESION | -0.76974976 | -2.0230186 | 0.014377791 |
| GOCC_KINETOCHORE_MICROTUBULE | -0.6225829 | -2.021101 | 0.014440287 |
| GOBP_KINETOCHORE_ORGANIZATION | -0.84054875 | -2.0210435 | 0.014357725 |
| GOCC_MIDBODY | -0.4809188 | -2.0202072 | 0.014333641 |
| GOBP_MITOTIC_CHROMOSOME_CONDENSATION | -0.8206734 | -2.0192087 | 0.014485877 |
| GOBP_DNA_REPLICATION_CHECKPOINT_SIGNALING | -0.8086211 | -2.019043 | 0.014387293 |
| GOBP_T_CELL_PROLIFERATION | -0.5837565 | -2.0183113 | 0.014367399 |
| GOBP_REGULATION_OF_SPINDLE_ORGANIZATION | -0.5546622 | -2.0166817 | 0.014496842 |
| GOBP_POSITIVE_REGULATION_OF_CYTOKINE_PRODUCTION | -0.5561996 | -2.0165496 | 0.014396322 |
| GOBP_REGULATION_OF_CD4_POSITIVE_ALPHA_BETA_T_CELL_ACTIVATION | -0.66670555 | -2.016297 | 0.014330707 |
| GOBP_MICROTUBULE_DEPOLYMERIZATION | -0.6564662 | -2.0159452 | 0.014316663 |
| GOBP_RESPONSE_TO_GAMMA_RADIATION | -0.57145303 | -2.0157573 | 0.014249673 |
| GOBP_POSITIVE_REGULATION_OF_ALPHA_BETA_T_CELL_ACTIVATION | -0.6679577 | -2.013699 | 0.014504284 |
| GOBP_NON_MEMBRANE_BOUNDED_ORGANELLE_ASSEMBLY | -0.45608664 | -2.011949 | 0.014742206 |
| GOBP_ACUTE_INFLAMMATORY_RESPONSE_TO_ANTIGENIC_STIMULUS | -0.7846269 | -2.0097566 | 0.014910472 |
| GOBP_LEUKOCYTE_MEDIATED_IMMUNITY | -0.56857973 | -2.0089219 | 0.014880645 |
| GOBP_CD4_POSITIVE_ALPHA_BETA_T_CELL_ACTIVATION | -0.63330674 | -2.0079505 | 0.014905173 |
| GOBP_DNA_INTEGRITY_CHECKPOINT_SIGNALING | -0.58486354 | -2.0071254 | 0.01488189 |
| GOBP_REGULATORY_T_CELL_DIFFERENTIATION | -0.7498 | -2.0038912 | 0.015366801 |
| GOBP_POSITIVE_REGULATION_OF_LEUKOCYTE_PROLIFERATION | -0.6033901 | -2.0028305 | 0.015509976 |
| GOCC_ENDOPEPTIDASE_COMPLEX | -0.4249065 | -2.0016448 | 0.015626289 |
| GOBP_NEGATIVE_REGULATION_OF_CELL_DIVISION | -0.7371292 | -1.999907 | 0.015830938 |
| GOBP_POSITIVE_REGULATION_OF_INTERLEUKIN_8_PRODUCTION | -0.61859274 | -1.9996289 | 0.01575013 |
| GOBP_POSITIVE_REGULATION_OF_MACROPHAGE_DIFFERENTIATION | -0.75333315 | -1.9976257 | 0.01595946 |
| GOCC_GERM_CELL_NUCLEUS | -0.54307103 | -1.9975826 | 0.01585235 |
| GOBP_REGULATION_OF_B_CELL_ACTIVATION | -0.6180511 | -1.9961754 | 0.015900094 |
| GOBP_RESPONSE_TO_INTERLEUKIN_4 | -0.6458244 | -1.9958354 | 0.01584062 |
| GOBP_TYPE_II_INTERFERON_PRODUCTION | -0.67304754 | -1.99502 | 0.015910815 |
| GOBP_ALPHA_BETA_T_CELL_ACTIVATION | -0.62492883 | -1.9938173 | 0.015936907 |
| GOBP_MITOTIC_DNA_INTEGRITY_CHECKPOINT_SIGNALING | -0.5733109 | -1.9935389 | 0.015850058 |
| GOBP_REGULATION_OF_CYTOKINESIS | -0.5606424 | -1.9909548 | 0.016240973 |
| GOBP_REGULATION_OF_B_CELL_DIFFERENTIATION | -0.766175 | -1.9896296 | 0.016444242 |
| GOBP_DNA_RECOMBINATION | -0.5351967 | -1.9875643 | 0.016877748 |
| GOBP_ADAPTIVE_IMMUNE_RESPONSE | -0.60940844 | -1.9875102 | 0.016778724 |
| GOBP_LEUKOCYTE_CELL_CELL_ADHESION | -0.5588691 | -1.9874868 | 0.016673196 |
| GOBP_MITOTIC_DNA_REPLICATION | -0.8734317 | -1.9848095 | 0.017037798 |
| GOBP_MEIOSIS_I_CELL_CYCLE_PROCESS | -0.63625085 | -1.9845477 | 0.016964536 |
| GOBP_POSITIVE_REGULATION_OF_TYPE_II_INTERFERON_PRODUCTION | -0.72392225 | -1.980756 | 0.0176323 |
| GOBP_REGULATION_OF_MITOTIC_SPINDLE_ASSEMBLY | -0.5374304 | -1.9801884 | 0.017671965 |
| GOBP_REGULATION_OF_LYMPHOCYTE_MEDIATED_IMMUNITY | -0.58553475 | -1.979298 | 0.01780849 |
| GOBP_IMMUNOGLOBULIN_PRODUCTION | -0.56126755 | -1.9790652 | 0.017741859 |
| GOBP_REGULATION_OF_T_CELL_ACTIVATION | -0.5638316 | -1.9784516 | 0.017767217 |
| GOBP_CELL_KILLING | -0.5740959 | -1.9776508 | 0.017822115 |
| GOBP_CD8_POSITIVE_ALPHA_BETA_T_CELL_ACTIVATION | -0.7595138 | -1.9763011 | 0.018000057 |
| GOBP_REGULATION_OF_LYMPHOCYTE_ACTIVATION | -0.5495984 | -1.976228 | 0.017899903 |
| GOBP_NEGATIVE_REGULATION_OF_LYMPHOCYTE_MEDIATED_IMMUNITY | -0.6395048 | -1.9749542 | 0.01805754 |
| GOBP_REGULATION_OF_ALPHA_BETA_T_CELL_ACTIVATION | -0.6190196 | -1.9729241 | 0.018569559 |
| GOBP_POSITIVE_REGULATION_OF_CELL_ACTIVATION | -0.55536824 | -1.9712629 | 0.018839385 |
| GOBP_INTRINSIC_APOPTOTIC_SIGNALING_PATHWAY_IN_RESPONSE_TO_DNA_DAMAGE_BY_P53_CLASS_MEDIATOR | -0.51690257 | -1.9710244 | 0.018772308 |
| GOBP_POSITIVE_REGULATION_OF_CHEMOKINE_PRODUCTION | -0.6107142 | -1.9693655 | 0.018980647 |
| GOBP_PROTEIN_LOCALIZATION_TO_CONDENSED_CHROMOSOME | -0.86238384 | -1.9691267 | 0.018916298 |
| GOBP_REGULATION_OF_LEUKOCYTE_PROLIFERATION | -0.5779174 | -1.9644933 | 0.019800335 |
| GOBP_POSITIVE_REGULATION_OF_LYMPHOCYTE_ACTIVATION | -0.5632032 | -1.9630314 | 0.020069014 |
| GOBP_IMMUNOGLOBULIN_PRODUCTION_INVOLVED_IN_IMMUNOGLOBULIN_MEDIATED_IMMUNE_RESPONSE | -0.5951638 | -1.9626682 | 0.020029992 |
| GOBP_INTERLEUKIN_17_PRODUCTION | -0.7050018 | -1.9626583 | 0.019936545 |
| GOBP_B_CELL_ACTIVATION | -0.5435786 | -1.9620088 | 0.019997135 |
| GOCC_FICOLIN_1_RICH_GRANULE_LUMEN | -0.43999916 | -1.9608756 | 0.020184778 |
| GOBP_POSITIVE_REGULATION_OF_B_CELL_MEDIATED_IMMUNITY | -0.639545 | -1.9602466 | 0.02020079 |
| GOBP_REGULATION_OF_DNA_TEMPLATED_DNA_REPLICATION | -0.66822934 | -1.9599985 | 0.02013142 |
| GOBP_POSITIVE_REGULATION_OF_GRANULOCYTE_CHEMOTAXIS | -0.67271644 | -1.9593505 | 0.020117968 |
| GOBP_POSITIVE_REGULATION_OF_INTERLEUKIN_1_PRODUCTION | -0.6503036 | -1.959159 | 0.020100243 |
| GOBP_REGULATION_OF_ADAPTIVE_IMMUNE_RESPONSE | -0.5755665 | -1.9585503 | 0.020150268 |
| GOBP_POSITIVE_REGULATION_OF_CHROMOSOME_SEGREGATION | -0.78281987 | -1.9582881 | 0.020073043 |
| GOBP_LYMPHOCYTE_HOMEOSTASIS | -0.59859353 | -1.9563451 | 0.020526173 |
| GOBP_NEGATIVE_REGULATION_OF_UBIQUITIN_PROTEIN_TRANSFERASE_ACTIVITY | -0.6535907 | -1.9561219 | 0.020426696 |
| GOBP_REGULATION_OF_ACUTE_INFLAMMATORY_RESPONSE_TO_ANTIGENIC_STIMULUS | -0.8727328 | -1.9555405 | 0.020368306 |
| GOBP_DENDRITIC_CELL_MIGRATION | -0.74939454 | -1.9552089 | 0.020324092 |
| GOCC_NUCLEAR_REPLICATION_FORK | -0.695358 | -1.9549583 | 0.020302944 |
| GOCC_MICROTUBULE_ASSOCIATED_COMPLEX | -0.50335634 | -1.9533244 | 0.020573135 |
| GOBP_POSITIVE_REGULATION_OF_TUMOR_NECROSIS_FACTOR_SUPERFAMILY_CYTOKINE_PRODUCTION | -0.605631 | -1.95297 | 0.0205202 |
| GOBP_PRODUCTION_OF_MOLECULAR_MEDIATOR_INVOLVED_IN_INFLAMMATORY_RESPONSE | -0.57186735 | -1.9520112 | 0.020608429 |
| GOBP_DNA_TEMPLATED_DNA_REPLICATION_MAINTENANCE_OF_FIDELITY | -0.6604892 | -1.951924 | 0.020503283 |
| GOBP_CELLULAR_RESPONSE_TO_VIRUS | -0.54859614 | -1.9519039 | 0.020399205 |
| GOBP_POSITIVE_REGULATION_OF_CD4_POSITIVE_ALPHA_BETA_T_CELL_DIFFERENTIATION | -0.7045152 | -1.9518372 | 0.020301389 |
| GOBP_CD4_POSITIVE_ALPHA_BETA_T_CELL_DIFFERENTIATION | -0.6362739 | -1.951442 | 0.0202949 |
| GOBP_POSITIVE_REGULATION_OF_CYTOKINE_PRODUCTION_INVOLVED_IN_INFLAMMATORY_RESPONSE | -0.69471985 | -1.9507412 | 0.020355677 |
| GOBP_NEGATIVE_REGULATION_OF_INNATE_IMMUNE_RESPONSE | -0.5460509 | -1.9502993 | 0.02041729 |
| GOBP_DNA_UNWINDING_INVOLVED_IN_DNA_REPLICATION | -0.8333302 | -1.949483 | 0.020517426 |
| GOBP_NEGATIVE_REGULATION_OF_LEUKOCYTE_CHEMOTAXIS | -0.67934775 | -1.949098 | 0.020511843 |
| GOCC_OUTER_KINETOCHORE | -0.92092717 | -1.9485673 | 0.020531937 |
| GOBP_REGULATION_OF_LYMPHOCYTE_CHEMOTAXIS | -0.7418258 | -1.9478567 | 0.020561513 |
| GOCC_VESICLE_LUMEN | -0.43974292 | -1.9475056 | 0.020520803 |
| GOBP_POSITIVE_REGULATION_OF_CELL_CELL_ADHESION | -0.55837506 | -1.9471048 | 0.02048369 |
| GOCC_NUCLEAR_UBIQUITIN_LIGASE_COMPLEX | -0.54488194 | -1.9459276 | 0.020616962 |
| GOBP_T_HELPER_1_CELL_DIFFERENTIATION | -0.75520664 | -1.9447237 | 0.020782502 |
| GOBP_DNA_DEALKYLATION | -0.59648806 | -1.9442899 | 0.020780364 |
| GOBP_GLYCOPROTEIN_CATABOLIC_PROCESS | -0.5526813 | -1.9440994 | 0.020695113 |
| GOBP_ALPHA_BETA_T_CELL_PROLIFERATION | -0.6737654 | -1.9436443 | 0.020665659 |
| GOBP_PURINE_NUCLEOSIDE_MONOPHOSPHATE_BIOSYNTHETIC_PROCESS | -0.6494737 | -1.9435165 | 0.020630704 |
| GOBP_TUMOR_NECROSIS_FACTOR_SUPERFAMILY_CYTOKINE_PRODUCTION | -0.5750096 | -1.9404825 | 0.02123525 |
| GOBP_NEGATIVE_REGULATION_OF_T_CELL_PROLIFERATION | -0.58902454 | -1.940416 | 0.02114128 |
| GOBP_POSITIVE_REGULATION_OF_NEUTROPHIL_MIGRATION | -0.66740376 | -1.9384747 | 0.021355115 |
| GOBP_INTERLEUKIN_4_PRODUCTION | -0.6972864 | -1.937433 | 0.021416165 |
| GOMF_DNA_HELICASE_ACTIVITY | -0.65130377 | -1.9362031 | 0.02153802 |
| GOCC_KINESIN_COMPLEX | -0.61951953 | -1.9356148 | 0.02161289 |
| GOBP_REGULATION_OF_INFLAMMATORY_RESPONSE_TO_ANTIGENIC_STIMULUS | -0.6794866 | -1.934602 | 0.021761322 |
| GOBP_PYROPTOSIS | -0.73398376 | -1.9343426 | 0.02172797 |
| GOBP_REGULATION_OF_EXIT_FROM_MITOSIS | -0.6403979 | -1.9332709 | 0.02193191 |
| GOBP_POSITIVE_REGULATION_OF_T_CELL_MIGRATION | -0.70444924 | -1.9329545 | 0.021953743 |
| GOBP_T_CELL_CHEMOTAXIS | -0.757606 | -1.9328265 | 0.021860104 |
| GOCC_MALE_GERM_CELL_NUCLEUS | -0.52576005 | -1.9327835 | 0.02176665 |
| GOBP_INTERLEUKIN_1_PRODUCTION | -0.5912447 | -1.9326545 | 0.021703461 |
| GOBP_T_CELL_HOMEOSTASIS | -0.6020437 | -1.9310905 | 0.02200525 |
| GOMF_HYDROLASE_ACTIVITY_ACTING_ON_CARBON_NITROGEN_BUT_NOT_PEPTIDE_BONDS_IN_CYCLIC_AMIDINES | -0.6239586 | -1.9305621 | 0.022003096 |
| GOBP_ANTIGEN_PROCESSING_AND_PRESENTATION | -0.5835053 | -1.9304515 | 0.021934152 |
| GOBP_PYRIMIDINE_NUCLEOSIDE_METABOLIC_PROCESS | -0.68660086 | -1.9301451 | 0.021930559 |
| GOBP_POSITIVE_REGULATION_OF_ANTIGEN_RECEPTOR_MEDIATED_SIGNALING_PATHWAY | -0.75205564 | -1.9286702 | 0.02212398 |
| GOBP_POSITIVE_REGULATION_OF_ALPHA_BETA_T_CELL_DIFFERENTIATION | -0.62766314 | -1.9278008 | 0.022191327 |
| GOBP_NUCLEOSIDE_METABOLIC_PROCESS | -0.52602786 | -1.9277892 | 0.02210637 |
| GOBP_NEGATIVE_REGULATION_OF_MEIOTIC_CELL_CYCLE | -0.7270591 | -1.9277284 | 0.022026928 |
| GOBP_LEUKOCYTE_PROLIFERATION | -0.5406623 | -1.9268209 | 0.022201348 |
| GOBP_GRANULOCYTE_MIGRATION | -0.5823181 | -1.9261163 | 0.022241196 |
| GOBP_CENTROSOME_SEPARATION | -0.75631 | -1.925385 | 0.022338033 |
| GOBP_REGULATION_OF_VIRAL_PROCESS | -0.47054073 | -1.9252989 | 0.02225516 |
| GOCC_PROTEASOME_COMPLEX | -0.46333975 | -1.924989 | 0.022214036 |
| GOBP_POSITIVE_REGULATION_OF_INTERLEUKIN_10_PRODUCTION | -0.66502756 | -1.9249784 | 0.022125542 |
| GOBP_INTERLEUKIN_10_PRODUCTION | -0.64408404 | -1.9248224 | 0.022040993 |
| GOCC_AZUROPHIL_GRANULE | -0.44958806 | -1.9246297 | 0.021980973 |
| GOBP_DNA_REPLICATION_INITIATION | -0.7372603 | -1.9242896 | 0.022013195 |
| GOBP_ALPHA_BETA_T_CELL_DIFFERENTIATION | -0.6071058 | -1.9237309 | 0.022051532 |
| GOBP_REGULATION_OF_NEUTROPHIL_MIGRATION | -0.62628543 | -1.9235286 | 0.021998279 |
| GOBP_PRODUCTION_OF_MOLECULAR_MEDIATOR_OF_IMMUNE_RESPONSE | -0.51618564 | -1.9226906 | 0.022113543 |
| GOBP_POSITIVE_REGULATION_OF_MYELOID_LEUKOCYTE_MEDIATED_IMMUNITY | -0.7388124 | -1.9215357 | 0.022270948 |
| GOCC_VACUOLAR_LUMEN | -0.46091065 | -1.9207201 | 0.02239908 |
| GOBP_REGULATION_OF_T_CELL_CHEMOTAXIS | -0.7851726 | -1.9204599 | 0.022346832 |
| GOBP_RECOMBINATIONAL_REPAIR | -0.5587653 | -1.920368 | 0.022277012 |
| GOBP_CHEMOKINE_PRODUCTION | -0.56515074 | -1.9201916 | 0.022204978 |
| GOBP_HUMORAL_IMMUNE_RESPONSE_MEDIATED_BY_CIRCULATING_IMMUNOGLOBULIN | -0.685612 | -1.9200853 | 0.022135235 |
| GOBP_B_CELL_ACTIVATION_INVOLVED_IN_IMMUNE_RESPONSE | -0.57422817 | -1.9200466 | 0.022051932 |
| GOBP_DENDRITIC_CELL_CHEMOTAXIS | -0.78001124 | -1.9199297 | 0.021984372 |
| GOBP_REGULATION_OF_MONONUCLEAR_CELL_MIGRATION | -0.58189183 | -1.9198248 | 0.021915762 |
| GOBP_REGULATION_OF_VIRAL_GENOME_REPLICATION | -0.5325361 | -1.9193907 | 0.02192114 |
| GOBP_POSITIVE_REGULATION_OF_MONOCYTE_CHEMOTAXIS | -0.71233517 | -1.9193587 | 0.021856874 |
| GOBP_NEGATIVE_REGULATION_OF_CYTOKINE_PRODUCTION_INVOLVED_IN_INFLAMMATORY_RESPONSE | -0.6591041 | -1.9188721 | 0.021867761 |
| GOBP_POSITIVE_REGULATION_OF_IMMUNOGLOBULIN_PRODUCTION | -0.57472414 | -1.9176507 | 0.022046698 |
| GOMF_SINGLE_STRANDED_DNA_HELICASE_ACTIVITY | -0.7765907 | -1.9169978 | 0.022102248 |
| GOBP_LEUKOCYTE_MEDIATED_CYTOTOXICITY | -0.59394246 | -1.9166048 | 0.022113202 |
| GOBP_MITOTIC_G2_M_TRANSITION_CHECKPOINT | -0.6165165 | -1.9163386 | 0.022129176 |
| GOBP_INTERLEUKIN_12_PRODUCTION | -0.66670454 | -1.9162772 | 0.022083847 |
| GOBP_MEIOTIC_CELL_CYCLE | -0.54255056 | -1.9160321 | 0.022036307 |
| GOBP_LYMPHOCYTE_COSTIMULATION | -0.6921324 | -1.915998 | 0.021962319 |
| GOBP_INTERLEUKIN_2_PRODUCTION | -0.6365369 | -1.9158797 | 0.021896167 |
| GOBP_NEGATIVE_REGULATION_OF_LYMPHOCYTE_ACTIVATION | -0.5714367 | -1.914792 | 0.02209093 |
| GOBP_INTRINSIC_APOPTOTIC_SIGNALING_PATHWAY | -0.38593435 | -1.9147785 | 0.02201155 |
| GOBP_NEGATIVE_REGULATION_OF_LEUKOCYTE_PROLIFERATION | -0.60227114 | -1.9146391 | 0.022002604 |
| GOBP_NEGATIVE_REGULATION_OF_IMMUNE_RESPONSE | -0.5311185 | -1.9143012 | 0.02197821 |
| GOBP_REGULATION_OF_LYMPHOCYTE_DIFFERENTIATION | -0.55662066 | -1.9141814 | 0.021933151 |
| GOBP_BASE_EXCISION_REPAIR | -0.56298107 | -1.9133455 | 0.022091525 |
| GOBP_REGULATION_OF_DNA_REPLICATION | -0.52516377 | -1.9130695 | 0.0220538 |
| GOBP_REGULATION_OF_INTRINSIC_APOPTOTIC_SIGNALING_PATHWAY | -0.3881354 | -1.9094709 | 0.022778064 |
| GOBP_DNA_LIGATION | -0.66383475 | -1.9093001 | 0.022725362 |
| GOBP_POSITIVE_REGULATION_OF_B_CELL_ACTIVATION | -0.5804727 | -1.9079168 | 0.022916282 |
| GOBP_REGULATION_OF_CD4_POSITIVE_ALPHA_BETA_T_CELL_DIFFERENTIATION | -0.66696125 | -1.9072323 | 0.022962814 |
| GOBP_LEUKOCYTE_CHEMOTAXIS | -0.5599112 | -1.9064153 | 0.02309254 |
| GOBP_NEGATIVE_REGULATION_OF_LEUKOCYTE_MEDIATED_IMMUNITY | -0.6126115 | -1.9057345 | 0.02317599 |
| GOBP_T_HELPER_CELL_LINEAGE_COMMITMENT | -0.7541004 | -1.9047892 | 0.023347182 |
| GOBP_PROTEIN_DNA_COMPLEX_ASSEMBLY | -0.48242685 | -1.904635 | 0.023316188 |
| GOBP_HOMOLOGOUS_RECOMBINATION | -0.6426413 | -1.90459 | 0.023237452 |
| GOBP_EXIT_FROM_MITOSIS | -0.520675 | -1.9039924 | 0.023333486 |
| GOBP_REGULATION_OF_T_CELL_RECEPTOR_SIGNALING_PATHWAY | -0.664459 | -1.9035157 | 0.023326106 |
| GOMF_HISTONE_KINASE_ACTIVITY | -0.7056377 | -1.9031837 | 0.02333816 |
| GOBP_POSITIVE_REGULATION_OF_NUCLEAR_DIVISION | -0.52261335 | -1.9028442 | 0.023336964 |
| GOMF_PROTEIN_DISULFIDE_REDUCTASE_ACTIVITY | -0.5389222 | -1.9023597 | 0.023397354 |
| GOBP_POSITIVE_REGULATION_OF_T_CELL_RECEPTOR_SIGNALING_PATHWAY | -0.7764165 | -1.9023527 | 0.023319395 |
| GOBP_POSITIVE_REGULATION_OF_PROTEIN_UBIQUITINATION | -0.4549188 | -1.9019086 | 0.023396436 |
| GOBP_RESPONSE_TO_IONIZING_RADIATION | -0.51666105 | -1.90098 | 0.023530075 |
| GOBP_POSITIVE_REGULATION_OF_HEMOPOIESIS | -0.53297865 | -1.899435 | 0.023767022 |
| GOCC_DNA_POLYMERASE_COMPLEX | -0.70266056 | -1.8987321 | 0.023826063 |
| GOBP_LYMPHOCYTE_ACTIVATION_INVOLVED_IN_IMMUNE_RESPONSE | -0.5487549 | -1.8974952 | 0.024037655 |
| GOBP_INTERSTRAND_CROSS_LINK_REPAIR | -0.67894775 | -1.8970647 | 0.024036258 |
| GOCC_FICOLIN_1_RICH_GRANULE | -0.43755293 | -1.8968407 | 0.023987094 |
| GOBP_POSITIVE_REGULATION_OF_ADAPTIVE_IMMUNE_RESPONSE | -0.5662658 | -1.8959572 | 0.024104008 |
| GOBP_PROTEIN_LOCALIZATION_TO_CHROMATIN | -0.5807315 | -1.8958073 | 0.024068363 |
| GOBP_REGULATION_OF_CELL_KILLING | -0.59467477 | -1.8957436 | 0.023998288 |
| GOBP_PROTEIN_PROCESSING | -0.4156803 | -1.8949947 | 0.024081787 |
| GOBP_SOMATIC_DIVERSIFICATION_OF_IMMUNOGLOBULINS | -0.5559613 | -1.8930507 | 0.024411721 |
| GOBP_NEUTROPHIL_MIGRATION | -0.5933115 | -1.892188 | 0.024547214 |
| GOBP_NEGATIVE_REGULATION_OF_B_CELL_ACTIVATION | -0.70211875 | -1.8895128 | 0.025151925 |
| GOBP_REGULATION_OF_INNATE_IMMUNE_RESPONSE | -0.49951884 | -1.8877797 | 0.025586376 |
| GOBP_POSITIVE_REGULATION_OF_LYMPHOCYTE_MEDIATED_IMMUNITY | -0.57042557 | -1.8875388 | 0.025567537 |
| GOBP_CELLULAR_RESPONSE_TO_INTERFERON_BETA | -0.6324357 | -1.8870393 | 0.025587734 |
| GOMF_CHEMOKINE_BINDING | -0.7125635 | -1.8868175 | 0.025585625 |
| GOBP_POSITIVE_REGULATION_OF_INTERLEUKIN_12_PRODUCTION | -0.6642431 | -1.8864783 | 0.025590766 |
| GOBP_MITOTIC_G2_DNA_DAMAGE_CHECKPOINT_SIGNALING | -0.62977934 | -1.8860188 | 0.025600947 |
| GOBP_REGULATION_OF_ACUTE_INFLAMMATORY_RESPONSE | -0.62879425 | -1.8856269 | 0.025607206 |
| GOBP_PHAGOCYTOSIS | -0.5251232 | -1.8854719 | 0.025546428 |

Abbreviations. KEGG=Kyoto Encyclopedia of Genes and Genomes, GOBP= Gene Ontology Biological Process, GOMF= Gene Ontology Molecular Function,GOCC= Gene Ontology Cellular Component,ES = Enrichment Score,NES = Normalized Enrichment Score.
